# Supplementary material for: High oxygen-reduction activity and durability of nitrogen and sulfur dual doped porous carbon microspheres
Source: Royal Society of Chemistry journal article supplement (doi:10.1039/c5dt05040e), 2016-01-01
Supplement: c5dt05040e1.pdf [file c5dt05040e1.pdf]

## Supporting Information:

### High oxygen-reduction activity and durability of nitrogen and sulfur dual doped porous carbon microspheres

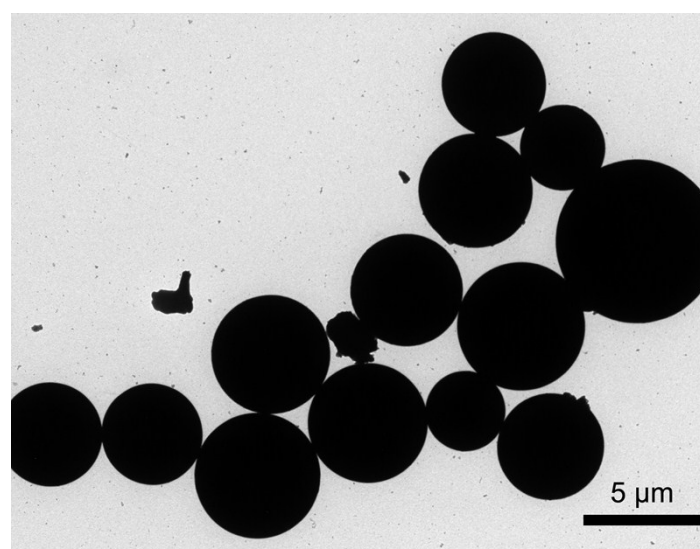

**Fig. S1.** TEM image of NS-CMSs

**Table S1**

Physicochemical properties of the heteroatom-doped CMSs.

| Catalyst    | BET surface<br>area (m <sup>2</sup> g <sup>-1</sup> ) | XPS(at%)                                       |                |       |       |      |      |
|-------------|-------------------------------------------------------|------------------------------------------------|----------------|-------|-------|------|------|
|             |                                                       | Pore volume (cm <sup>3</sup> g <sup>-1</sup> ) | Pore size (nm) | C     | O     | N    | S    |
| N-CMSs      | -                                                     | -                                              | -              | 63.5  | 35.57 | 0.93 | -    |
| N-CMSs-800  | -                                                     | -                                              | -              | 59.76 | 39.18 | 1.06 | -    |
| NS-CMSs     | -                                                     | -                                              | -              | 66.97 | 22.49 | 5.24 | 5.29 |
| NS-CMSs-700 | 542.4                                                 | 0.147                                          | 1.026          | 81.13 | 15.89 | 2.43 | 0.55 |
| NS-CMSs-800 | 830.4                                                 | 0.682                                          | 1.484          | 80.72 | 16.83 | 1.99 | 0.46 |
| NS-CMSs-900 | 394.4                                                 | 0.218                                          | 1.030          | 80.01 | 18.92 | 0.98 | 0.09 |

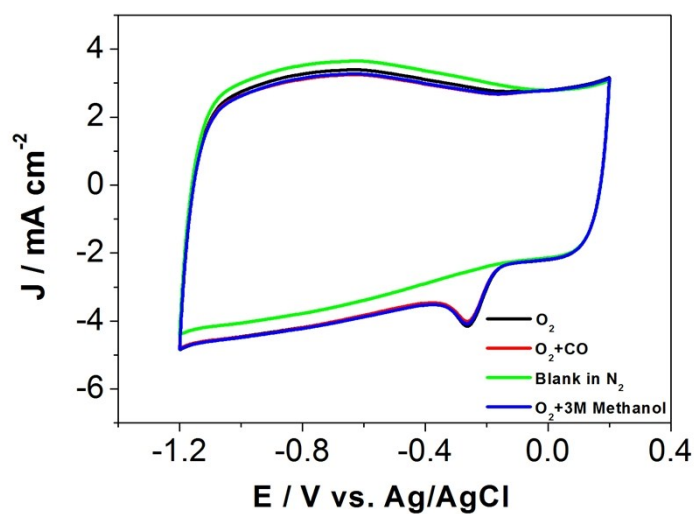

**Fig. S2** . CVs of NS-CMSs-800 in  $N_2$ -saturated,  $O_2$ -saturated, 3 M methanol  $O_2$ -saturated, CO and  $O_2$ -saturated 0.1 M KOH with scan rate of  $50 \text{ mV s}^{-1}$ .

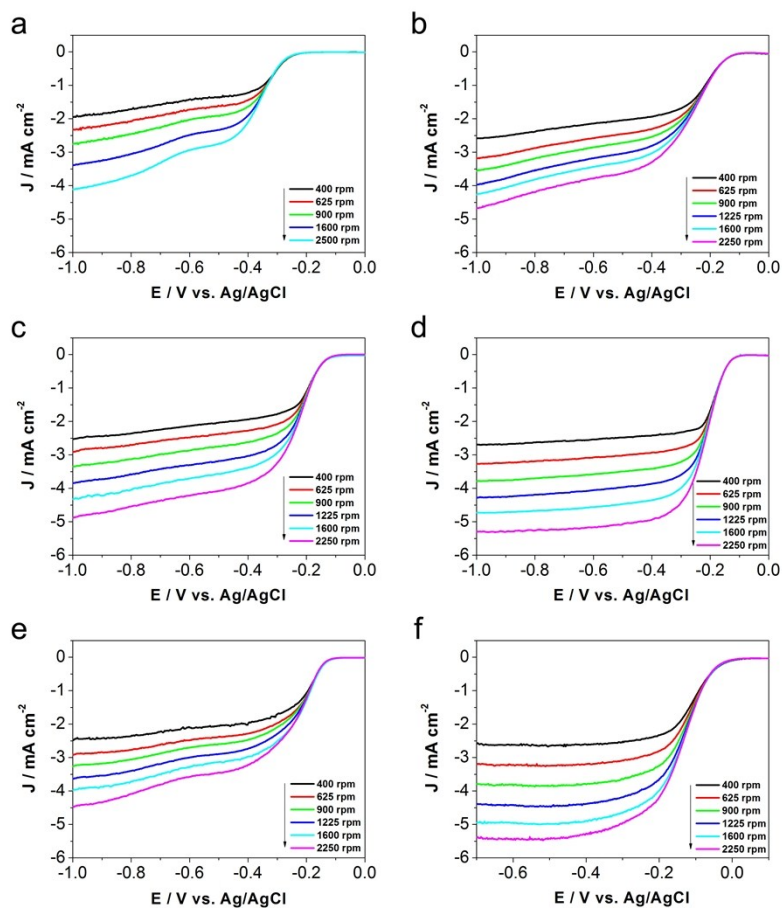

**Fig. S3** . RDE linear sweep voltammograms for (a) NS-CMSs, (b) N-CMSs-800, (c) NS-CMSs-700, (d) NS-CMSs-800, (e) NS-CMSs-900 and (f) Pt/C at various rotation speeds and scan rate of  $10 \text{ mV s}^{-1}$ .

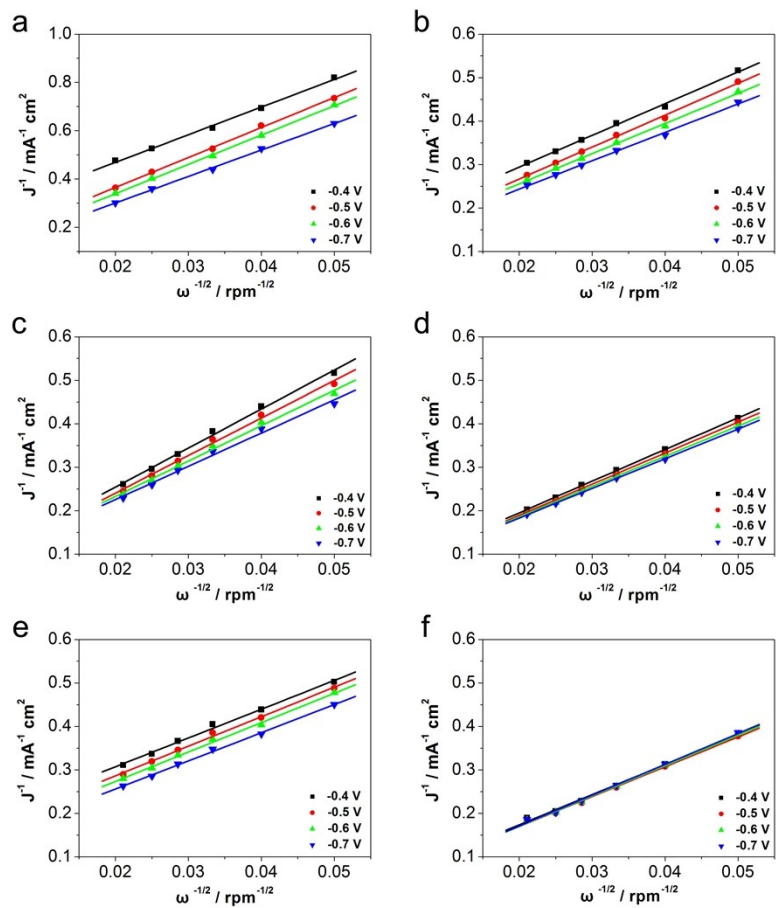

**Fig. S4** . K-L plots of (a) NS-CMSs, (b) N-CMSs-800, (c) NS-CMSs-700, (d) NS-CMSs-800, (e)NS-CMSs-900 and (f) Pt/C.
